# Supplementary material for: IgG-detection devices for the Tus-Ter-lock immuno-PCR diagnostic platform
Source: Royal Society of Chemistry journal article supplement (doi:10.1039/c1an15731k), 2011-01-01
Supplement: c1an15731k.pdf [file c1an15731k.pdf]

**IgG-detection devices for the  
Tus-*Ter*-lock immuno-PCR diagnostic platform**

Isabelle Morin, Samuel P. Askin and Patrick Schaeffer\*

Comparative Genomics Centre - School of Pharmacy & Molecular Sciences,

DB 21 - James Cook Drive

James Cook University

Townsville, QLD 4811, Australia.

E-mail: [Patrick.Schaeffer@jcu.edu.au](mailto:Patrick.Schaeffer@jcu.edu.au)

Fax: +61 (0)7 47816078;

Tel: +61 (0)7 47814448

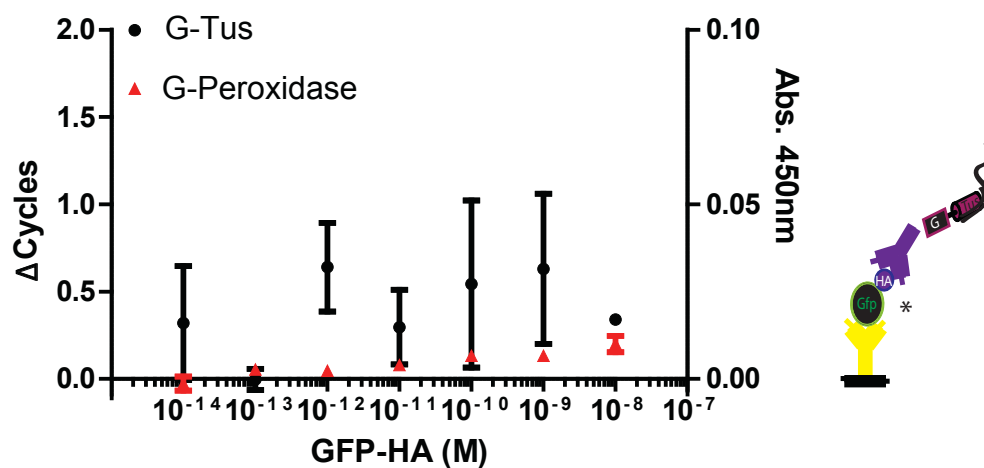

**Figure 1S**

Performance of the G-Tus detection device in a sandwich TT-lock qIPCR format using a chicken IgY-based capture system and a primary rat anti-HA IgG. Chicken anti-GFP IgY was used for capture of GFP fused to an HA epitope. Rat anti-HA IgG was used as a primary antibody. The efficiency of G-Tus (black circles) and G-peroxidase (red triangles) was compared for detection of GFP through its HA-epitope. As expected and in agreement with the literature, the Protein G-based detection devices did not bind to the rat IgG.

**Table S1: Oligonucleotide sequences**

|        |                                                                                   |
|--------|-----------------------------------------------------------------------------------|
| JCU49  | AAAAAAACATATGGGCGGCGGCGCGGTTACGATCTCGTAGACC                                       |
| JCU50  | AAAAAAGAATTCAAATTCGCAACATACAGGTGCAGCC                                             |
| JCU119 | AAAAAAGTCGACGCGGTTACGATCTCGTAGACCGACTCAACACTACC                                   |
| JCU120 | AAGCTTGTGACGGAGCTCGAATTCAAATTCGCAAC                                               |
| JCU121 | AAAAAAGGATCCGCGGTTACGATCTCGTAGACCGACTCAACACTACC                                   |
| JCU122 | AAAAAAGGATCCATTCGCAACATACAGGTGCAGCCGTGGAATGATC                                    |
| JCU156 | CCAGAAGAACCATGGACACTTAC                                                           |
| JCU157 | AAAAAAGGATCCGAAGCGGCCCATTTTCAGTTACCG                                              |
| JCU152 | TATGGGTAGCGGTACCGGTAGCGCTAGCGGACCTCAAGGGTTGGGAACGAG                               |
| JCU153 | CGCGCTCGTTCCCAACCCTTGAGGTCCGCTAGCGCTACCGGTACCGCTACCCA                             |
| JCU159 | AGCTTGGACCTCAAGGGTTGGGTACCTACCCATACGATGTTCCAGATTACGCTC                            |
| JCU160 | TCGAGAGCGTAATCTGGAACATCGTATGGGTAGGTACCCAACCCTTGAGGTCCA                            |
| JCU161 | GGCCGGCGCTAGCTTGGG                                                                |
| JCU162 | AAAAAAGAATTCAATTTGTAGAGCTCATCCATGCCATGTG                                          |
| JCU45  | CACCGCTGAGCAATAACTAGCATAAAAAAAGAAGTGGATCTCAACAGCGGTCTTTAGTTACAACA<br>TACTTATA     |
| JCU46  | TATGTTGTAATAAAGACCGCTGTTGAGATCCAGTTC                                              |
| JCU39  | CACCGCTGAGCAATAACTAGCAT                                                           |
| JCU40  | ACCGCTGTTGAGATCCAGTTC                                                             |
| JCU222 | Bio.CTTTAGTTACAACATACTTATACACCGCTGAGCAATAACTAGCATAAAAAAAGAAGTGGAT<br>CTCAACAGCGGT |
